# Supplementary material for: Thioredoxin Domain Containing 5 Suppression Elicits Serum Amyloid A-Containing High-Density Lipoproteins
Source: MDPI journal article supplement (doi:10.3390/biomedicines10030709), 2022-03-18
Supplement: s1 [file s1]

**Table S1:** Characteristics of primers used in RT-qPCR according to MIQE guidelines.

| Gene symbol | Accession      | Sequence                                                             | Amplicon length | Exons | [Primer]    | Efficiency |
|-------------|----------------|----------------------------------------------------------------------|-----------------|-------|-------------|------------|
| Cyp7a1      | NM_007824.3    | Sense CATTACAGAGTGCTGGCCAAGA<br>Antisense CTGTCCGGATATTCAAGGATGC     | 144             | 4/5   | 0.1 $\mu$ M | 97%        |
| Lcn2        | NM_008491.1    | Sense GGAACGTTTCACCCGCTTTG<br>Antisense TGAACCATTGGGTCTCTGCG         | 140             | 5/6   | 0.1 $\mu$ M | 104%       |
| Lpin1       | NM_001355598.1 | Sense TACCCCCAGTCAGCATCGTA<br>Antisense CTTTTTGGTGTTGAGGGCCG         | 89              | 5/6   | 0.1 $\mu$ M | 96%        |
| Resf1       | NM_001289662.1 | Sense AATCCCGACGGAGGGACTAA<br>Antisense GCTTTGGAGGTGGCTGTAT          | 232             | 3     | 0.1 $\mu$ M | 98%        |
| Rhobtb1     | NM_001081347.1 | Sense CGGGAGCGAGAGCTTTGTAA<br>Antisense CAGCAGCTGGTACTGTGTCA         | 158             | 2/3   | 0.1 $\mu$ M | 101%       |
| Saa1        | NM_009117.4    | Sense TTAGCTCAGTAGGTTGTGCTGG<br>Antisense ACAATGTTTCCCCAGAGAGCA      | 92              | 4     | 0.1 $\mu$ M | 97%        |
| Saa2        | NM_011314.3    | Sense CTGGCTGGAAAGATGGAGAC<br>Antisense TGTCTCTCGTGTCTCTGC           | 147             | 3/4   | 0.1 $\mu$ M | 104%       |
| Slc4a1      | NM_011403.2    | Sense GATCCCAGATCGAGACAGCG<br>Antisense CACATAGACCTGACCGGAGC         | 184             | 3/5   | 0.1 $\mu$ M | 107%       |
| Txndc5      | NM_145367.4    | Sense CAGGCTTGTCTCAGATGTCACCAT<br>Antisense TAACCTCGTACCGAGTACTTGCTG | 82              | 8/9   | 0.2 $\mu$ M | 100%       |
| Ppib        | NM_011149      | Sense GGAGATGGCACAGGAGGAA<br>Antisense GTAGTGCTTCAGCTTGAAGTTCTCAT    | 72              | 3/4   | 0.1 $\mu$ M | 103%       |

**Table S2:** Sequence quality metrics and genome mapping of GSE185515.

| Group           | Total Raw Reads (M) | Total Clean Reads (M) | Clean Reads (%)  | Mapping Ratio (%)  |
|-----------------|---------------------|-----------------------|------------------|--------------------|
| Wildtype (n=3)  | 48,31 $\pm$ 1,44    | 44,69 $\pm$ 1,08      | 44,69 $\pm$ 1,08 | 92,86 $\pm$ 1,0652 |
| Knock-out (n=3) | 49,97 $\pm$ 1,44    | 45,73 $\pm$ 1,08      | 45,73 $\pm$ 0,36 | 93,34 $\pm$ 0,42   |

**Supplementary Table S3:** Summary of SNP variant type of GSE185515.

| Group     | A-G        | C-T        | Transition | A-C      | A-T      | C-G      | G-T      | Transversion | Total      |
|-----------|------------|------------|------------|----------|----------|----------|----------|--------------|------------|
| Wildtype  | 1673 ± 342 | 1677 ± 351 | 3350 ± 692 | 365 ± 93 | 336 ± 64 | 301 ± 80 | 319 ± 78 | 1321 ± 306   | 4670 ± 989 |
| Knock-out | 1621 ± 342 | 1635 ± 351 | 3256 ± 692 | 350 ± 93 | 277 ± 64 | 297 ± 80 | 328 ± 78 | 1252 ± 306   | 4509 ± 989 |

A-G: The amount of A-G variant type; C-T: The amount of C-T variant type; Transition: The amount of A-G and C-T variant type; A-C: The amount of A-C variant type; A-T: The amount of A-T variant type; C-G: The amount of C-G variant type; G-T: The amount of G-T variant type; Transversion: The amount of A-C, A-T, C-G and G-T variant type  
Total: The amount of all variant type

**Supplementary Table S4:** Summary of splice variant type of GSE185515.

| Group     | SE          | MXE      | A5SS      | A3SS      | RI       |
|-----------|-------------|----------|-----------|-----------|----------|
| Wildtype  | 3353 ± 1019 | 275 ± 85 | 693 ± 122 | 831 ± 150 | 338 ± 54 |
| Knock-out | 3508 ± 1019 | 302 ± 85 | 718 ± 122 | 905 ± 150 | 346 ± 54 |

SE: Skipped Exon, MXE: Mutually exclusive exons, A5SS and A3SS: Alternative 5' or 3' Splicing Site respectively and RI: Retained Intron.

**Supplementary Table S5.** Changes in hepatic *Txndc5* expression.

| Experimental condition                    | Type of change | Signal log <sub>2</sub> ratio | Accession number |
|-------------------------------------------|----------------|-------------------------------|------------------|
| Fish oil                                  | Increased      | 0.6                           | GDS1307          |
| Iron deficient, LPS injected mice         | Increased      | 0.5                           | GDS5271          |
| TGFβ-activated kinase 1 deficiency        | Increased      | 0.5                           | GDS5474          |
| Very low-fat diet in mice                 | Increased      | 0.3                           | GDS1517          |
| Alcoholic hepatitis                       | Increased      | 0.1                           | GDS4389          |
| Dexamethasone                             | Decreased      | -0.6                          | GDS5035          |
| NF-E2-related factor 2 Nrf2 deficiency    | Decreased      | -0.3                          | GDS3476          |
| Sphingosine 1-phosphate lyase deficiency  | Decreased      | -0.12                         | GDS3654          |
| Caspase-1 deficiency                      | No change      | -0.06                         | GDS4922          |
| Dicer1 deficiency                         | No change      | -0.05                         | GDS3685          |
| Steroid receptor coactivator-2 deficiency | No change      | 0.05                          | GDS4785          |
| Interleukin 6                             | No change      | 0.02                          | GSD3773          |

Data obtained from Genome Expressed Omnibus data bank and Array express. <https://www.ncbi.nlm.nih.gov/geoprofiles/> <https://www.ebi.ac.uk/arrayexpress/>.
